# Supplementary material for: In situ construction of WO3/g-C3N4 composite photocatalyst with 2D–2D heterostructure for enhanced visible light photocatalytic performance
Source: Royal Society of Chemistry journal article supplement (doi:10.1039/c9nj04311j), 2019-01-01
Supplement: c9nj04311j1.pdf [file c9nj04311j1.pdf]

# **In-situ construction of WO<sub>3</sub>/g-C<sub>3</sub>N<sub>4</sub> composite photocatalyst with 2D-2D heterostructure for enhanced visible light photocatalytic performance**

Huaqiang Zhuang<sup>\*a</sup>, Zhenping Cai<sup>c</sup>, Wentao Xu<sup>a</sup>, Mianli Huang<sup>a</sup>, Xiaobin Liu<sup>\*b</sup>

<sup>a</sup>College of Chemical Engineering and Materials Science, Quanzhou Normal University, Quanzhou  
362000, P. R. China

<sup>b</sup>Environmental Science Research Center, College of the Environment & Ecology, Xiamen  
University, Xiamen 361005, P. R. China

<sup>c</sup>Department of Chemical Engineering, Norwegian University of Science and Technology, N-7491,  
Trondheim, Norway

E-mail: [huaqiangz@163.com](mailto:huaqiangz@163.com), [liuxb6757196@126.com](mailto:liuxb6757196@126.com)

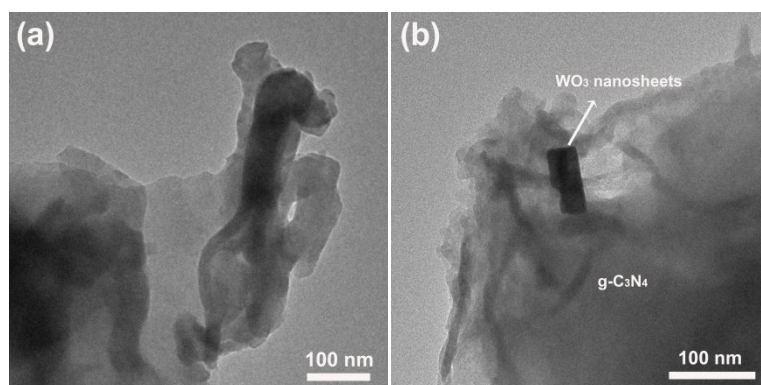

**Figure S1** TEM images of (a)  $g\text{-C}_3\text{N}_4$  nanosheets and (b) CNW-13 sample.

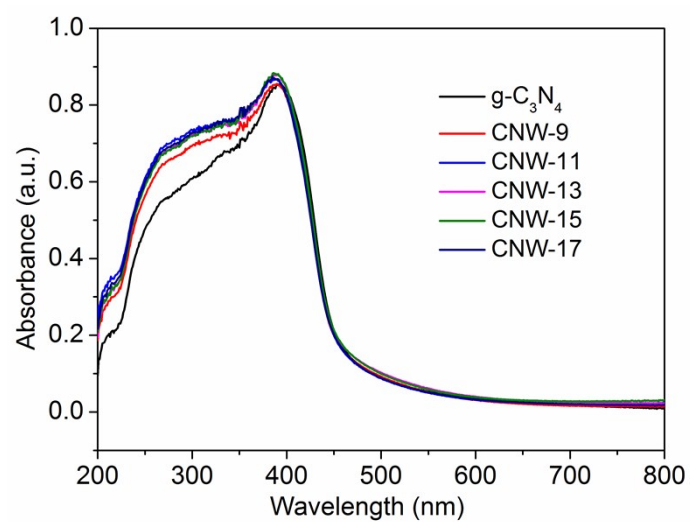

**Figure S2** UV-vis DRS spectra of g-C<sub>3</sub>N<sub>4</sub>, CNW-9, CNW-11, CNW-13, CNW-15 and CNW-17 samples.

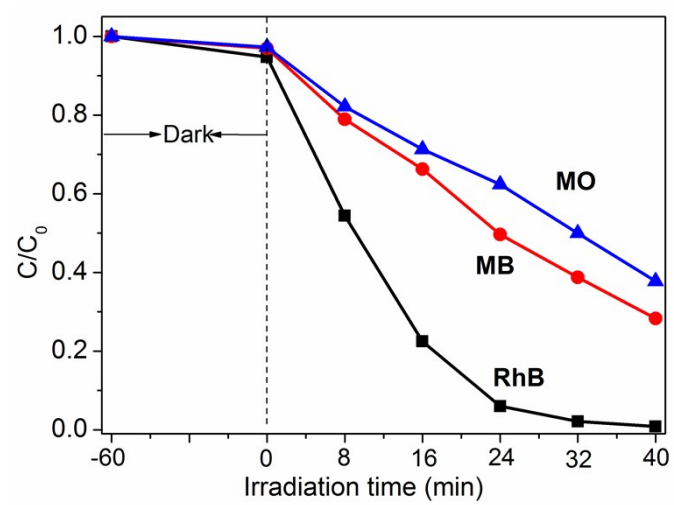

**Figure S3** The photocatalytic activity of CNW-13 sample for RhB, MB and MO degradation under visible light irradiation.
